# Supplementary material
Source: PubMed Central journal article supplement (PMC6046262)
Supplement: NIHMS970359-supplement-1.pdf [file NIHMS970359-supplement-1.pdf]

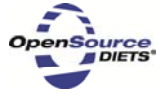

## D11112201, D11112226, D11112229 and D17030102

Formulated by  
Research Diets, Inc  
Sridhar Radhakrishnan  
May 2017

Open Standard Diet with 15 kcal% Fat and Same With Different levels of Inulin or Cellulose

| Product #                | D11112201      |             | D11112226      |             | D11112229     |             | D17030102      |             |
|--------------------------|----------------|-------------|----------------|-------------|---------------|-------------|----------------|-------------|
|                          | Control OSD    |             | 10% Inulin     |             | No Fiber      |             | 10% Cellulose  |             |
|                          | gm%            | kcal%       | gm%            | kcal%       | gm%           | kcal%       | gm%            | kcal%       |
| Protein                  | 19.0           | 20          | 19.5           | 20          | 20.7          | 20          | 18.8           | 20          |
| Carbohydrate             | 63.1           | 65          | 69.3           | 65          | 67.4          | 65          | 61.1           | 65          |
| Fat                      | 6.5            | 15          | 6.7            | 15          | 7.1           | 15          | 6.5            | 15          |
| Fiber                    | 9.3            |             | 9.6            |             | 0.0           |             | 9.3            |             |
| Total                    |                | 100         |                | 100         |               | 100         |                | 100         |
| kcal/gm                  | 3.81           |             | 3.92           |             | 4.17          |             | 3.78           |             |
| <b>Ingredient</b>        | <b>gm</b>      | <b>kcal</b> | <b>gm</b>      | <b>kcal</b> | <b>gm</b>     | <b>kcal</b> | <b>gm</b>      | <b>kcal</b> |
| Casein                   | 200            | 800         | 200            | 800         | 200           | 800         | 200            | 800         |
| L-Cystine                | 3              | 12          | 3              | 12          | 3             | 12          | 3              | 12          |
| Corn Starch              | 381            | 1524        | 353            | 1412        | 390.5         | 1562        | 390.5          | 1562        |
| Maltodextrin 10          | 110            | 440         | 110            | 440         | 110           | 440         | 110            | 440         |
| Dextrose                 | 150            | 600         | 150            | 600         | 150           | 600         | 150            | 600         |
| Cellulose, BW200         | 75             | 0           | 0              | 0           | 0             | 0           | 100            | 0           |
| Inulin                   | 25             | 37.5        | 100            | 150         | 0             | 0           | 0              | 0           |
| Soybean Oil              | 70             | 630         | 70             | 630         | 70            | 630         | 70             | 630         |
| Mineral Mix S10026       | 10             | 0           | 10             | 0           | 10            | 0           | 10             | 0           |
| Dicalcium Phosphate      | 13             | 0           | 13             | 0           | 13            | 0           | 13             | 0           |
| Calcium Carbonate        | 5.5            | 0           | 5.5            | 0           | 5.5           | 0           | 5.5            | 0           |
| Potassium Citrate, 1 H2O | 16.5           | 0           | 16.5           | 0           | 16.5          | 0           | 16.5           | 0           |
| Vitamin Mix V10001       | 10             | 40          | 10             | 40          | 10            | 40          | 10             | 40          |
| Choline Bitartrate       | 2              | 0           | 2              | 0           | 2             | 0           | 2              | 0           |
| Yellow Dye #5, FD&C      | 0.025          | 0           | 0              | 0           | 0             | 0           | 0              | 0           |
| Red Dye #40, FD&C        | 0              | 0           | 0.025          | 0           | 0             | 0           | 0.025          | 0           |
| Blue Dye #1, FD&C        | 0.025          | 0           | 0.025          | 0           | 0.05          | 0           | 0.025          | 0           |
| <b>Total</b>             | <b>1071.05</b> | <b>4084</b> | <b>1043.05</b> | <b>4084</b> | <b>980.55</b> | <b>4084</b> | <b>1080.55</b> | <b>4084</b> |
